# Supplementary material for: Sperm DNA Fragmentation and Sperm-Borne miRNAs: Molecular Biomarkers of Embryo Development?
Source: MDPI journal article supplement (doi:10.3390/ijms24021007), 2023-01-05
Supplement: s1 [file s1]

**Supplementary Table S1.** Univariate statistical models to evaluate the association between the parameters age, BMI, smoking and SDF on the expression of miR-34c-5p and miR-449b-5p.

| <i>Univariate analysis</i> |             |                            |          |                       |
|----------------------------|-------------|----------------------------|----------|-----------------------|
|                            |             | <b>B<br/>(95% CI)</b>      | <b>B</b> | <b><i>p value</i></b> |
| Age ♂                      | miR-34c-5p  | -0.035<br>(-0.078 – 0.008) | -0.266   | 0.107                 |
|                            | miR-449b-5p | -0.010<br>(-0.054 – 0.034) | -0.081   | 0.642                 |
| BMI ♂                      | miR-34c-5p  | -0.027<br>(-0.092 – 0.038) | -0.137   | 0.410                 |
|                            | miR-449b-5p | -0.045<br>(-0.104 – 0.014) | -0.259   | 0.133                 |
| Smoking<br>♂               | miR-34c-5p  | -0.198<br>(-0.666 – 0.269) | -0.142   | 0.395                 |
|                            | miR-449b-5p | -0.309<br>(-0.741 – 0.124) | -0.245   | 0.156                 |
| SDF                        | miR-34c-5p  | 0.383<br>(-0.199 – 0.965)  | 0.230    | 0.190                 |
|                            | miR-449b-5p | 0.520<br>(0.015 – 1.026)   | 0.364    | <b>0.044</b>          |
